# Supplementary material for: A seasonality trigger for carbon injection at the Paleocene–Eocene Thermal Maximum
Source: Copernicus journal article supplement (doi:10.5194/cp-10-759-2014), 2014-04-16
Supplement: Supplementary file 1 [file Supporting datafile.xlsx]

## Sheet: Dinocysts
Depth (feet)	Depth (m)	Bosedinia spp.	Leioshpaeridia spp.	Mirchystridium spp.	Pterospermella spp.	Tamanites	Azolla	Microforaminiferal test lining	Cometosphaeridium cometes	Pediastrum	Achomosphaera alcicornu	Alfordia fortensis	Alisocysta margarita	Alisocysta margarita cristata	Alisocysta sp. 2 H-C	Amorphosphaeridium multispinosum	Apectodinium augustum	Apectodinium homomorphum	Apectodinium hypercanthum	Apectodinium paniculatum	Apectodinium parvum	Apectodinium quinquelatum	Apectodinium spp.	Apectodinium summissum	Areoligera cf. gippingensis	Areoligera coronata complex	Areoligera coronata delicata	Areoligera gippingensis	Areoligera pastielsii	Areoligera senonensis	Areoligera spp.	Caligodinium amiculum	Cerodinium depressum	Cerodinium minutum	Cerodinium speciosum glabrum	Cerodinium speciosum speciosum	Cerodinium spp.	Cerodinium wardenense	Cordosphaeridium fibrospinosum	Cordosphaeridium gracile	Cordosphaeridium inodes	Cordosphaeridium minimum	Cordosphaeridium spp.	Cribroperidinium tenuitabulatum	Deflandrea denticulata	Deflandrea oebisfeldensis	Deflandrea spp.	Diphyes colligerum	Diphyes rigaudiae
8968	2207.66		13		3	1					3	15														2						2				2		1	1	2	1				1	9		1
8981.4	2210.59		8		20							2			3															1		2	2		6	2		34			3			1		10
8996.9	2213.97		12		42						1	8			1											3						6	25		10	1		4			1					4
9009	2216.63		36		63							4			1											3				1		6	2		2			1			2		2					2
9015.5	2218.07	6	1	1	22		2	1		1	2	1					58	29		9	1	1	31								3	1		2			1		3		2
9018.2	2218.66	35	1		3	1	1			1		3					71	15	1	1			17			10			5			2	1						1		4		1
9022	2219.5	43		1	2		11		1	5					1		58	18	3	15		7	2			4				3		9								6	3				3			4
9031.8	2221.66	25			5		3			3							44	19		14			8				2					4	3		1				2		6							3
9043.5	2224.24	27										5					20	15		5	1		6				2				4	4		1						1	2	1						2
9055.5	2226.88	32	2	1	1					1		4					26	56		12		2	7			2	74				1	4		3	4	5				4	3							1
9064.5	2228.87	12			1					7		2					23	168	1	26	1	2	1			1	26				2	1								1								1
9069.3	2229.92	5						2				1					42	43	2	33		1	9			4	56					3			2	1			1		3
9072.2	2230.56	15	1							2		5					36	16		2						3	32					2																1
9079.2	2232.11	3	6		4	1				1		5					30	8		4			4			4	24		1		3	7		1	4													2
9082	2232.72	3	1							2		8					55	59		20			18			2	24					4		5	7						1							4
9097.2	2236.07	1								5							49	57		88	2	2	17			9	16				3	3			3
9099	2236.47									3							39	45	2	105	1	3	15			8	11								6						1
9101.8	2237.09		1							1							14	37		146	1	1	3			48	15		1	3					3	1												2
9108	2238.47									6		1					35	8		59	1		7			11	2												1
9115.7	2240.18									2							23			37			7			1	4		1		1				3		1			1	1
9131.3	2243.64	2															15	2	1	24			9
9140.9	2245.78																28	5		67	1		9			7			1		3									2	6
9155	2248.91		1							3							7	3		10			3				1								4		2
9166.2	2251.4	1		2	2					2		1					12	6		25	70	4				8					2					5
9181.1	2254.71			1					1								4	2		7	22					7					1			1		3		1		2
9198	2258.47	1						1		16							28	2		11	47	12		7		5					8			1		7			1	3
9209.6	2261.04								2	8			1				24	9		22	70	1	20	8						1	7					4				1					1			1	1
9224.4	2264.32			2						8							2	3			6		5	5						3	14	1		1		3
9235.2	2266.71					1				16			1				36	4			8		18			2				2	5	1			9	6				2								1
9248.6	2269.68			1		1			2	13							1			1			11			3				1	11				1					5	1							1
9259.5	2272.1									10							41	3		4			34			3				3	10	1								1					1
9267.4	2273.85					1			5		1		1												2	1		1							1				1	8
9280	2276.64								15	3	6	1	3												4	1		6		2	2				9	39				5
9286.8	2278.15			1			1		16	2			2													1		5							1	39				2
9292	2279.31					1			21	1	4		20			1										11		27				1				6				14
9297.4	2280.5								39		24		4	2														54				1				6				6
9315	2284.39								50		8		7															22								1				3
[truncated: 43 more columns]

## Sheet: pollen-spores
Depth (AH ft)	Depth (m)	Alnipollenites trina	Alnipollenites versus	Azolla	Bombacacidites reticulatus	Bombacacidites spp. (3 pore)	Camarozonosporites spp.	Caryapollenites simplex	Caryapollenites triangulus	Caryapollenites veripites	Chasmatosporites spp.	Cicatricosisporites dorogensis	Compositosporites rhizophorus	Crassotrilites	Culpuliferoidaepollenites spp.	Cupanidites spp.	Cycath/Palmae	Cycathadites australis	Deltoidospora	Ericipites spp.	Foveotrilites spp.	Gleichenidites senonicus	granulatosporites	Inaperturopollenites hiatus	Indet.	Interpollis supplingensis	Labrapollis labraferoides	Laevigatosporites spp.	Liquidambarpollenites spp.	Lycopodiumsporites spp.	Microfoveotrilies spp.	Mompites coryloides	Mompites tenuipollis	Mompites ventiflumis	Monocolpites	Nyssapollenites	Osmundacidites spp.	Pistillipollenites mcgregorii	Platycaryapollenites platycaryoides	Plicapollis pseudoexcelsus	Polyatrioporopollenites stellatus	Polyatripollenites spp.	Polypodiaceiosporites spp.	Retricolpites spp.	Retricolporopollenites spp.	Rousisporites spp.	Salixpollenites spp.	Sapotaceoidaepollenites spp.	Sciadopityosporites spp.
8968	2207.66		4					2	9								1					1		150				1				1			1				3	2				6			2
8981.4	2210.59		1					5	9															154		1		3				3			2				2	2				1			1
8996.9	2213.97		4					3	4								2							124								4							7	7				3			3
9009	2216.63		13					1	5				1						1					120											1				17	6				7			1
9015.5	2218.07	1	16	2				77	10	13		2	3		7			1	8					34		2		4				19				1	3		32	18				8			2
9018.2	2218.66		6	1			3	32	23	50		4	2		4			2	6					4	2		1	7				7					3	1	24	7	1		1	6					2
9022	2219.5		5	11			3	25	13	34			7						5					29			2	10		1		13							7	4							1		1
9031.8	2221.66		4	3			1	18	9	91		7						3	7			1		1		3	2	19				9					1	2	9	4			7	8				1
9043.5	2224.24		1			2	2	4	17	109		2	1		2				1			2		19		11	6	7		1		2				1	1		14	3				18			1
9055.5	2226.88		2				5	6	21	11		1	1		1			2	2					5		19	9	2				3							21	1		1		6
9064.5	2228.87		1			1	5	2	4			1	4		1			5	10			8		1		4	8	37	3	1		2			2		4	1	2			2	7	5			1		1
9069.3	2229.92		1				3	4	11			3	2		1	2		2	9		2	2		14		7	9	34				3			5		2	1	5	1			2	8
9072.2	2230.56		2				1	12	13	2					5	3			4	1	1	1		9		6	7	15				5			1	1			8	2			2	3					1
9079.2	2232.11		2		2	2	1	4	12		1	1	2		4			7	3		1	2		7	2	14	4	10			1	10				5	2		14			1	1	5			1	1
9082	2232.72				1		1	1	7		1	2	1		1			2	6			1		6	3	8	7	12			1	6				1			5				3	9					1
9097.2	2236.07		2			2	2	1	7	2	2	3	10				2	16	18			7		9		14	5	39			2	5				2	2		2				11	4					5
9099	2236.47						1				1	1	2					7	39			10		5		3		25				4			1				2				6	6					5
9101.8	2237.09				4		5	3	2	2	1	3	5	1			2	2	20			8		9	4	9	1	22		1		3					3		3			6	2	5		1	1		2
9108	2238.47		1		5	4	1	1	5	2	1	1	2					5	52					2	3	27	4	3				3					1		4			3	3	1
9115.7	2240.18		1		3		2	3		1		3	2				3	1	17			4		6	3	30		30		2	2	3				4			11			2	1	7			2		2
9131.3	2243.64										1				3		1	1	12			2	1	2		34		18				8				2			21			1	3	3			2
9140.9	2245.78				2		9	2				1	1	3	2		2	3	38			6	1	6	1	24		23		1		3					1							3					4
9155	2248.91		5		3		5	2	1		1	1	1	4				3	51		1	2		6	2	12		18			1								15			1	2	1	2		1		1
9166.2	2251.4		2				12		4		7	9		12			3	4	46		1	4		24		6		16			1	6							8				1	1					5
9181.1	2254.71		2		2		12	2	3		2	5	3	7			3	11	50		1	5		26		8		14	1			6					4		9				3						4
9198	2258.47		3		2		26	1	2		1	20	4	4				8	63	1		5	3	24		4		20		1	3	8	5		2		5		9				2			2	1		5
9209.6	2261.04				1		18	1	3		3	11		9				6	33					32		3		24	1		3	16			3				1			1	1	6		1			6
9224.4	2264.32		2				10		3		3	14	2	6				4	40		1	2		22		8		21		1	3	9			2				4			2							1
9235.2	2266.71		15		1	1	7		2		1	6	2	2				1	29			4		45		6		7				20	3	2	1				10	1						1	1
9248.6	2269.68		8				3	1	5			1	1	3			3	3	23		2	1		99				5				15			1		2		1	1			1						6
9259.5	2272.1		12					1	5			3						2	15			1		118		2		6				11	3		1				2					1					7
9267.4	2273.85		5						2				1				2		3		1	1		167						1		1					2		1	2				1
9280	2276.64		4															1	11			4		156				4		2		2					2						1	1		1			1
9286.8	2278.15			1			4		2				1					4	6			4		110				2				6			1		4
9292	2279.31		5				2	1	1	1		4	1					5	19	1	1	5		56	2			1				3					7												2
9297.4	2280.5																	1	9		1	1		48						1	1	2					2						1	1
9315	2284.39
[truncated: 29 more columns]

## Sheet: climate estimates
Depth (AHD ft)	Depth (m)	Bioclimatic Analyses												MCR Method
		MAT	MAT error	CMMT-	CMMT error	WMMT-	WMMT error	MAP	MAP error	wMoPPT	wMoPPT error	CMoPPT	CMoPPT error	MAT	MAT error	CMMT	CMMT error	WMMT	WMMT error	MAP	MAP error	wMoPPT	wMoPPT error	CMoPPT	CMoPT error
8968	2207.66	16.07	3.25	8.92	3.12	23.17	3.5	1267.6	362.4	150.267	56.5333	70.7333	22.9333	15.65	-0.35	8.7	0.9	22.45	-0.6	1333	227	77.6667	-68.6667	81.5	-9.5
8981.4	2210.59	16.11	4.07	8.36	4.18	23.26	2.9	1245.8	328.2	118.233	19.3667	73.0333	17.6333	15.65	-0.35	8.7	0.9	22.45	-0.6	1320	214	77.6667	-68.6667	81.5	-9.5
8996.9	2213.97	15.35	3.97	7.85	4.19	23.44	3.1	1199.4	345	107.367	13.6333	70.7333	22.9333	14.1	1.2	7.55	2.05	22.45	-0.6	1320	214	77.6667	-68.6667	81.5	-9.5
9009	2216.63	16.99	3.27	8.84	3.84	23.47	3.1	1237.5	306.9	108.467	12.5333	63.0333	15.2333	15.65	-0.35	8.7	0.9	22.45	-0.6	1320	214	77.6667	-68.6667	77.8333	-13.1667
9015.5	2218.07	16.515	3.985	8.9575	4.3375	23.075	4.4	1244.75	331.25	153.067	51.6333	56.15	31.5167	16.1583	1.75833	10.75	1.65	24.35	1.4	1224	118	126.333	-20	63.8333	0.833333
9018.2	2218.66	16.1925	3.2525	9.63	3.26	24.0725	3.2	1269.65	339.35	150.107	30.8407	48.45	21.35	15.5	1.1	8.15	-1.15	25.05	0.6	1224	118	128.167	-21.8333	56.5	-6.5
9022	2219.5	16.01	4.33	8.92	3.9	24.62	3.2	1240	309.6	146.967	23.8333	45.9333	23.1333	15.5	1.1	8.15	-1.15	25.05	0.6	1224	118	128.167	-21.8333	56.5	-6.5
9031.8	2221.66	16.01	4.33	10.225	2.985	24.25	2.9	1195.1	354.5	107.344	17.352	54.9027	32.1027	15.7083	2.20833	10.85	1.55	25.05	0.6	1224	118	126.333	-20	67.5	4.5
9043.5	2224.24	17.045	3.455	11.245	2.125	25.38	2.5	1249.55	319.45	150.341	45.9747	55.156	29.456	19.15	0.95	12.65	-0.25	25.05	0.6	1320	214	133.667	-12.6667	63.8333	0.833333
9055.5	2226.88	16.72	3.54	10.3567	2.81667	24.125	2.7	1280.3	349.7	158.6	52.4	53.4027	24.2027	16.1583	1.75833	10.85	1.55	25.05	0.6	1333	227	175.167	28.8333	63.8333	0.833333
9064.5	2228.87	17.25	2.85	11.1	2	25.35	2.5	1280.5	349.5	155.833	48.1667	48.5	23.5	17.4	-0.8	9.95	-2.95	25.05	0.6	1320	214	135.5	-14.5	56.5	-6.5
9069.3	2229.92	17.125	3.175	10.1208	3.22083	24.25	3.9	1247.25	347.75	135.707	29.8733	55.25	32.0833	16.9583	0.958333	10.75	1.65	24.475	1.5	1320	214	133.667	-12.6667	48.3333	16.3333
9072.2	2230.56	15.1817	4.48167	9.66	3.3	23.41	2.5	1248.2	367.8	161.033	48.5667	54.8053	28.4053	16.3	0.3	8.15	-1.15	23.95	-0.4	1320	214	135.5	-14.5	56.5	-6.5
9079.2	2232.11	17.315	3.185	11.2792	2.03917	25.225	2.3	1236.65	351.35	151.548	54.552	55.2047	31.3047	18.0583	-0.141667	12.65	-0.25	25.05	0.6	1320	214	133.667	-12.6667	63.8333	0.833333
9082	2232.72	16.78	3.36	10.645	1.855	25.27	2.6	1158	378.6	118.3	11	47.134	26.2673	17.4	-0.8	9.95	-2.95	25.9	1.5	1320	214	135.5	-14.5	41	9
9097.2	2236.07	15.8667	2.48667	10.51	2.03	24.31	1.9	1241.1	340.9	124.731	17.7973	49.5347	25.268	16.75	-1.45	9.95	-2.95	23.15	-1.3	1320	214	79.5	-70.5	70.5	-20.5
9099	2236.47	17.59	3.55	11.05	2.47	24.93	3	1239.1	333.3	143.933	13.0667	43.5333	24.0667	16.3	0.3	8.15	-1.15	26.1	1.7	1320	214	135.5	-14.5	37.5	12.5
9101.8	2237.09	16.79	3.35	10.875	1.595	25.4	2.4	1241.05	325.95	114.458	7.158	49.0173	24.384	16.75	-1.45	9.95	-2.95	23.15	-1.3	1320	214	79.5	-70.5	70.5	-20.5
9108	2238.47	18.16	2.62	11.995	1.615	25.485	2.6	1189.1	363.1	115.206	10.106	49.938	31.8713	19.15	0.95	12.65	-0.25	26.15	1.8	1320	214	133.667	-12.6667	44.8333	19.8333
9115.7	2240.18	16.79	3.35	10.63	1.84	25.225	2.6	1225.85	310.75	118.3	11	47.134	26.2673	17.4	-0.8	9.95	-2.95	25.05	0.6	1320	214	135.5	-14.5	56.5	-6.5
9131.3	2243.64	16.3	4.6	9.66	3.86	24.76	2.8	1209.4	339	125.831	31.1693	57.9373	28.7373	16.7	3.8	11.2	1.9	25.05	0.6	1320	214	133.667	-12.6667	67.5	4.5
9140.9	2245.78	16.6717	2.99167	11.2033	1.90333	25.58	2.3	1182.9	371.9	120.664	5.264	46.3	24.2333	17.4	-0.8	9.95	-2.95	25.175	0.8	1320	214	135.5	-14.5	41	9
9155	2248.91	16.7358	3.14583	11.165	1.865	25.3775	2.2	1243.75	313.65	153.617	42.0833	46.4833	24.7833	17.4	-0.8	9.95	-2.95	25.05	0.6	1320	214	135.5	-14.5	56.5	-6.5
9166.2	2251.4	16.045	3.285	10.605	1.445	25.295	1.9	1192.45	366.75	118.85	2.15	59.1047	22.7047	14.4	0.9	8.15	-1.15	23.15	-1.3	1320	214	79.5	-70.5	70.5	-20.5
9181.1	2254.71	17	3.5	11.2	1.9	25.45	2.5	1245.5	314.5	117.413	9.74667	46.6667	25.3333	17.4	-0.8	9.95	-2.95	25.05	0.6	1320	214	135.5	-14.5	56.5	-6.5
9198	2258.47	16.1542	2.20417	10.65	1.45	24.3875	1.4	1247	348	114.957	9.12333	51.0867	27.92	16.75	-1.45	9.95	-2.95	23.15	-1.3	1320	214	79.5	-70.5	70.5	-20.5
9209.6	2261.04	16.8775	1.1275	10.58	1.28	25.1975	0.9	1245.4	321.6	135.7	-6.4	49.0173	24.384	18.75	-3.45	12.1	-5.1	23.8	-1.9	1320	214	79.5	-70.5	67.5067	-23.4933
9224.4	2264.32	16.8317	3.15167	11.1933	2.05333	25.355	2.1	1232.1	301.9	118.2	2.8	46.3	24.2333	16.3	0.3	8.15	-1.15	25.05	0.6	1320	214	135.5	-14.5	56.5	-6.5
9235.2	2266.71	17.41	1.73	11.1983	1.93833	24.62	1.7	1273.8	356.2	121.5	17.5	55.3053	31.0387	16.75	-1.45	11.25	-1.65	23.15	-1.3	1320	214	77.6667	-68.6667	77.8333	-13.1667
9248.6	2269.68	16.15	2.65	10.75	1.65	25.4	2.4	1280	350	155.833	48.1667	46.6667	25.3333	16.3	0.3	8.15	-1.15	25.05	0.6	1320	214	135.5	-14.5	56.5	-6.5
9259.5	2272.1	15.9158	2.65583	10.6875	1.9775	25.1	2.9	1254.7	412.8	179.617	45.9833	47.5187	28.6853	16.3	0.3	8.15	-1.15	25.175	0.8	1333	227	177	27	37.5	12.5
9267.4	2273.85	16.225	3.425	8.9	3.55	23.25	3.6	1280.25	349.75	114.957	9.12333	61.9167	17.9167	14.85	0.45	7.8	1.8	22.45	-0.6	1320	214	77.6667	-68.6667	77.8333	-13.1667
9280	2276.64	...	...	...	...	...	...	...	...	...	...	...	...	...	...	...	...	...	...	...	...	...	...	...	...
9286.8	2278.15	15.995	2.275	9	3.32	23.08	2.7	1251.5	320.9	109.2	3	63.0333	15.2333	15.65	-0.35	8.7	0.9	22.45	-0.6	1224	118	77.6667	-68.6667	77.8333	-13.1667
9292	2279.31	15.2567	2.39667	9.23	2.61	23.15	2.3	1189.5	378.5	120.664	5.264	46.3	24.2333	14.85	0.45	8.15	-1.15	23.15	-1.3	1320	214	79.5	-70.5	70.5	-20.5
9297.4	2280.5	...	...	...	...	...	...	...	...	...	...	...	...	...	...	...	...	...	...	...	...	...	...	...	...
9315	2284.39	...	...	...	...	...	...	...	...	...	...	...	...	...	...	...	...	...	...	...	...	...	...	...	...

## Sheet: NLR list
palynomorph listed in counts	NLR used	climate range data source
Alnipollenites trina	Alnus	Thompson et al. 2000
Alnipollenites versus	Alnus	Thompson et al. 2000
Azolla	Azolla carolinana + A filiculoides	ANH + NRC (ANUCLIM)
Bombacacidites reticulatus	Bombax	GBIF (WorldCLIM)
Bombacacidites spp. (3 pore)	Bombax	GBIF (WorldCLIM)
Caryapollenites simplex	Carya cordiformis	Thompson et al. 2000
Caryapollenites triangulus	Carya undiff.	Thompson et al. 2000
Caryapollenites veripites	Carya undiff.	Thompson et al. 2000
Cicatricosisporites dorogensis	Schizaeaceae (Anemia)	GBIF (WorldCLIM)
Compositopollenites rhizophorus	Icacinaceae (genus Iodes)	Fang et al. 2011
Crassotrilites	Lygodium	ANH (ANUCLIM) + GBIF (WorldCLIM)
Culpuliferoidaepollenites spp.	Castanea	Thompson et al. 2000
Cycad/palm	Cycads (Cycadaceae + Zamiaceae)	ANH (ANUCLIM) + GBIF (WorldCLIM)
Ericipites spp.	Arbutus + Rhododendron	Thompson et al. 2000
Gleichenidites senonicus	Dicranopteris + Gleichenia	ANH (ANUCLIM) + GBIF (WorldCLIM)
Inaperturopollenites hiatus	Metasequoia glyptostroboides	Fang et al. 2011
Liquidambarpollenites spp.	Liquidambar sp.	Thompson et al. 2000
Mompites coryloides	Engelhardia	Fang et al. 2011
Mompites tenuipollis	Engelhardia	Fang et al. 2011
Mompites ventiflumis	Engelhardia	Fang et al. 2011
Monocolpites	Arecaceae	ANH (ANUCLIM) + GBIF (WorldCLIM)
Nyssapollenites	Nyssa	Thompson et al. 2000
Osmundacidites spp.	Osmunda	GBIF (WorldCLIM)
Platycaryapollenites platycaryoides	Platycarya	Fang et al. 2011
Salixpollenites spp.	Salix	Thompson et al. 2000
Sciadopityosporites spp.	Sciadopitys	GBIF (WorldCLIM)
Sequoiapollenites spp.	Sequoia sempervirens	Thompson et al. 2000
Sparganiaceaepollenites spp.	Typha sp.	ANH + NRC (ANUCLIM)
Stereisporites spp.	Typha sp.	ANH + NRC (ANUCLIM)
Spinozonocolpites	?Nypa	Fang et al. 2011
Tiliaepollenites microreticulatus	Tilia	Thompson et al. 2000
Triatriopollenites spp.	Myrica	Thompson et al. 2000
Tricolporopollenites spp.	Fagus	Thompson et al. 2000
Trilites spp.	Lygodium	ANH (ANUCLIM) + GBIF (WorldCLIM)
Triporopollenites robustus	Celtis	Thompson et al. 2000
Triporopollenites spp.	Celtis	Thompson et al. 2000
Typhapollenites obscurus	Typha sp.	ANH + NRC (ANUCLIM)
Ulmipollenites spp.	Ulmus	Thompson et al. 2000
Picea	Picea	Thompson et al. 2000
Cedrus spp.	Cedrus	GBIF (WorldCLIM)
Abies	Abies	Thompson et al. 2000
Pinus	Pinus	Thompson et al. 2000

## Sheet: PT Zonation
Depth (mbsf)	Depth (AHD ft)	Marine Palynological Events	Terrestrial Palynological events		Shell PT Zone
2207.66	8968	CMN A. fortensis, LDAO G. ordinata, ABN Lentinita wetzelii	ABN I. hiatus	PT20	PT20.2 (pars)
2210.59	8981.4	FDCO Pterospermella spp., Influx C. wardenense, LDCO H. tubiferum, FDAO F. cf. fragilis, FDO C. speciosum glabrum			PT20.1	PT20.1.2		Sele Formation	Sele S2a
2213.97	8996.9	FDAO Pterospermella spp., LDO D. oebisfeldensis, LDAO F. cf. fragilis, Influx C. depressum				PT20.1.1
2216.63	9009	LDO Lentinita wetzelii	FDCO A. versus, FDCO P. platycaryoides; LDAO I. hiatus, LDAO Pinusspp.
2218.07	9015.5	LDAO Pterospermella spp. FDAO A. augustum, FDFO G. Reticulata	LDCO A. versus, FDFO C. veripites, ABN C. simplex, FDO Azolla spp.	PT19	PT19.4	PT19.4.2	PT19.4.2.b		Sele S1b
2218.66	9018.2	FDAO Bosedinia spp.	FDAO C. veripites, FDO L. labraferoides				PT19.4.2a
2219.5	9022	FDAO G. reticulata
2221.66	9031.8	LDAO G. reticulata, LDO Azolla spp. FDO A. coronata "delicata"
2224.24	9043.5		LDAO C. veripites, FDFO L. labraferoides
	9048				missing section
2226.88	9055.5	FDAO A. homomorphum, FDAO A. coronata "delicata", LDCO S. ramosus, LDAO Bosedinia spp.	LDFO C. veripites		PT19.3	PT19.3.2
2228.87	9064.5
2229.92	9069.3
2230.56	9072.2	LDFO Bosedinia spp, LDAO A. coronata "delicata", LDO G. reticulata
2232.11	9079.2		FDO B. reticulatus			PT19.3.1
2232.72	9082	LDCO A. coronata "delicata", LDFO A. fortensis
2236.07	9097.2	FDAO A. paniculatum, LDFO C. amiculum	FDCO Deltoidosporites, LDFO L. labraferoides (cons)		PT19.2	PT19.2.3
2236.47	9099
2237.09	9101.8		FDFO B. reticulatus, FDAO I. supplingensis			PT19.2.2
2238.47	9108
2240.18	9115.7	LDO A. coronata "delicata"
2243.64	9131.3
2245.78	9140.9		FDFO Crassotriletes spp., FDAO Deltoidosporites			PT19.2.1
2248.91	9155
2251.4	9166.2	FDAO A. parvum, FDCO P. pyrophorum	FDFO Camerazonosporites, FDCO I. hiatus		PT19.1	PT19.1.2			Sele S1a
2254.71	9181.1
2258.47	9198	FDCO Pediastrum spp. FDFO A. summissum, FDFO Impletosphaeridium spp.	FDFO T. obscurus
2261.04	9209.6	LDCO A. paniculatum & A. parvum
2264.32	9224.4	LDFO/LDO A. summissum	LDAO Deltoidosporites, LDFO T. obscurus
2264.5	9225	CIE base
2266.71	9235.2		FDAO I. hiatus, FDCO A. versus, LDCO Camerazonosporites, FDSAO Pinus spp.			PT19.1.1
2269.68	9248.6		LDO/LDFO Crassotriletes
2272.1	9259.5	LDAO/LDO A. augustum, LDCO pediastrum spp., FDCO S. ramosus	LDCO A. versus
2273.85	9267.4	FDFO C. cometes, FDO A. alcicornu, FDO A. gippingensis, FDO (cons) A. Margarita (NP9; Elison 1996)	FDSAO I. hiatus	PT15	PT15.2.5			Lista Formation	Lista L3
2276.64	9280
2278.15	9286.8	LDCO P. pyrophorum
2279.31	9292	FDSAO S. ramosus, Influx Impletosphaeridinium spp. FDCO C. cometes, FDCO A. margarita, FDCO A. gippingensis			PT15.2.4				Lista L2
2280.5	9297.4	ABN A. Gippingensis (NP8)
2281.06	9304	FDCO Spiroplectamins spectabilis (mid NP9; Galleoti)
2284.39	9315	FDAO C. cometes, FDO/FDFO S. pachyderma
		FDO = First downhole occurrence
		LDO = last downhole occurrence
		FDFO = First downhole frequent occurrence
		LDFO = last downhole frequent occurrence
		FDCO = First downhole common occurrence
		LDCO = last downhole common occurrence
		FDAO = First downhole abundant occurrence
		LDAO = last downhole abundant occurrence
		FDSAO = First downhole super-abundant occurrence
		LDSAO = last downhole super-abundantoccurrence
